# Supplementary material
Source: MDPI journal article supplement (https://www.mdpi.com/1424-2818/15/10/1091)
Supplement: s1 [file s1]

## Supplementary Materials for

### **Spatio-temporal patterns in the distribution of albacore, bigeye, skipjack and yellowfin tuna species within Exclusive Economic Zones of Tonga for the years 2002 to 2018.**

Siosaia Vaihola\*, Dawit Yemane, Stuart Kininmonth

This file includes:

**Table S1.** Numerical index of relative importance.

**Table S2.** Model summary best GAM models, *smooth effects*.

**Table S3.** Model summary best GAM models, *parametric effects*.

**Figure S1.** Spatio-temporal distribution pattern for albacore tuna.

**Figure S2.** Spatio-temporal distribution pattern for bigeye tuna.

**Figure S3.** Spatio-temporal distribution pattern for skipjack tuna.

**Figure S4.** Spatio-temporal distribution pattern for yellowfin tuna.

**Figure S5.** Annual & monthly variability of sea surface temperature.

**Figure S6.** Annual & monthly variability of sea surface chlorophyll-a concentration.

**Figure S7.** Annual & monthly variability of sea surface chlorophyll-a gradient.

**Figure S8.** Annual & monthly variability of sea surface temperature gradient.

**Figure S9.** Bathymetry of the EEZ of Tonga.

**Figure S10.** Partial effects with partial residuals of covariates.

**Figure S11.** Model diagnostic plots of predicted values vs observed values

**Figure S12.** Model diagnostic plots.

**Table S1.** Summary of numerical index of relative importance of predictors for the four tuna species in the EEZ, of Tonga.

| <i>Species</i>   | <i>Predictors</i> | <i>mean</i> | <i>sd</i> | <i>n</i> | <i>se</i> | <i>New_predictors</i> |
|------------------|-------------------|-------------|-----------|----------|-----------|-----------------------|
| <i>Albacore</i>  | chl_grad          | 0.015       | 0.000     | 50       | 5.08E-05  | z_chlorophyll_grad    |
|                  | depth             | 0.064       | 0.002     | 50       | 3.05E-04  | depth                 |
|                  | log_chl           | 0.036       | 0.001     | 50       | 1.42E-04  | chlorophyll           |
|                  | month             | 0.580       | 0.010     | 50       | 1.36E-03  | month                 |
|                  | sst               | 0.230       | 0.006     | 50       | 8.21E-04  | sst                   |
|                  | sst_grad          | 0.006       | 0.000     | 50       | 2.75E-05  | z_sst_grad            |
|                  | year              | 0.284       | 0.006     | 50       | 8.58E-04  | year                  |
| <i>Bigeye</i>    | chl_grad          | 0.014       | 0.001     | 50       | 8.38E-05  | z_chlorophyll_grad    |
|                  | depth             | 0.088       | 0.002     | 50       | 2.46E-04  | depth                 |
|                  | log_chl           | 0.031       | 0.002     | 50       | 2.42E-04  | chlorophyll           |
|                  | month             | 0.301       | 0.005     | 50       | 6.60E-04  | month                 |
|                  | sst               | 0.121       | 0.005     | 50       | 7.22E-04  | sst                   |
|                  | sst_grad          | 0.004       | 0.000     | 50       | 1.60E-05  | z_sst_grad            |
|                  | year              | 0.501       | 0.011     | 50       | 1.56E-03  | year                  |
| <i>Skipjack</i>  | chl_grad          | 0.016       | 0.001     | 50       | 1.52E-04  | z_chlorophyll_grad    |
|                  | depth             | 0.047       | 0.003     | 50       | 4.75E-04  | depth                 |
|                  | log_chl           | 0.002       | 0.000     | 50       | 1.87E-05  | chlorophyll           |
|                  | month             | 0.527       | 0.019     | 50       | 2.73E-03  | month                 |
|                  | sst               | 0.044       | 0.005     | 50       | 6.92E-04  | sst                   |
|                  | sst_grad          | 0.007       | 0.000     | 50       | 6.92E-05  | z_sst_grad            |
|                  | year              | 0.740       | 0.023     | 50       | 3.28E-03  | year                  |
| <i>Yellowfin</i> | chl_grad          | 0.006       | 0.000     | 50       | 2.86E-05  | z_chlorophyll_grad    |
|                  | depth             | 0.034       | 0.001     | 50       | 1.66E-04  | depth                 |
|                  | log_chl           | 0.021       | 0.001     | 50       | 1.05E-04  | chlorophyll           |
|                  | month             | 0.398       | 0.008     | 50       | 1.18E-03  | month                 |
|                  | sst               | 0.017       | 0.000     | 50       | 5.89E-05  | sst                   |
|                  | sst_grad          | 0.001       | 0.000     | 50       | 3.28E-06  | z_sst_grad            |
|                  | year              | 0.564       | 0.010     | 50       | 1.38E-03  | year                  |

**Table S2.** Model summary for the best GAM model for the four species. Smooth effects; estimated degrees of freedom (*edf*), degrees of freedom (*df*), *F*-statistics and *p*-values and deviance explained are presented.

| <i>Species</i>   | <i>term</i> | <i>edf</i> | <i>df</i> | <i>F</i> -statistic | <i>p</i> -value | <i>Deviance explained</i> |
|------------------|-------------|------------|-----------|---------------------|-----------------|---------------------------|
| <i>Albacore</i>  | s(sst)      | 2.980      | 3.000     | 89.105              | ***0.000        | 0.278                     |
|                  | s(log_chl)  | 2.225      | 2.634     | 11.449              | ***0.000        |                           |
|                  | s(sst_grad) | 1.004      | 1.009     | 7.745               | ***0.005        |                           |
|                  | s(chl_grad) | 2.372      | 2.737     | 6.734               | ***0.000        |                           |
|                  | s(depth)    | 2.945      | 2.997     | 35.972              | ***0.000        |                           |
|                  | s(month)    | 7.495      | 8.000     | 111.290             | ***0.000        |                           |
| <i>Bigeye</i>    | s(sst)      | 2.935      | 2.997     | 28.143              | ***0.000        | 0.122                     |
|                  | s(log_chl)  | 2.849      | 2.983     | 5.423               | ***0.001        |                           |
|                  | s(sst_grad) | 1.002      | 1.004     | 2.073               | 0.150           |                           |
|                  | s(chl_grad) | 2.380      | 2.744     | 3.054               | ***0.021        |                           |
|                  | s(depth)    | 1.021      | 1.042     | 44.307              | ***0.000        |                           |
|                  | s(month)    | 5.552      | 8.000     | 20.255              | ***0.000        |                           |
| <i>Skipjack</i>  | s(sst)      | 2.646      | 2.915     | 3.828               | ***0.006        | 0.250                     |
|                  | s(log_chl)  | 1.001      | 1.001     | 0.574               | 0.449           |                           |
|                  | s(sst_grad) | 1.988      | 2.400     | 1.069               | 0.266           |                           |
|                  | s(chl_grad) | 2.213      | 2.607     | 2.555               | **0.053         |                           |
|                  | s(depth)    | 2.810      | 2.973     | 6.609               | ***0.001        |                           |
|                  | s(month)    | 6.600      | 8.000     | 28.836              | ***0.000        |                           |
| <i>Yellowfin</i> | s(sst)      | 2.631      | 2.908     | 7.218               | ***0.000        | 0.257                     |
|                  | s(log_chl)  | 2.634      | 2.910     | 8.221               | ***0.000        |                           |
|                  | s(sst_grad) | 1.005      | 1.010     | 0.791               | 0.376           |                           |
|                  | s(chl_grad) | 1.006      | 1.013     | 4.788               | ***0.028        |                           |
|                  | s(depth)    | 2.907      | 2.993     | 13.736              | ***0.000        |                           |
|                  | s(month)    | 7.223      | 8.000     | 52.405              | ***0.000        |                           |

\*\*\**p*-value < 0.005 is highly significant

**Table S3.** Model summary for the best GAM model for the four species. Parametric effects; estimate, standard error, F-statistics and p-values are presented.

| <i>Species</i>  | <i>term</i> | <i>estimate</i> | <i>std.error</i> | <i>F-statistic</i> | <i>p-value</i> |
|-----------------|-------------|-----------------|------------------|--------------------|----------------|
| <i>Albacore</i> | Intercept   | 2.774           | 0.050            | 55.056             | ***0.000       |
|                 | Year 2003   | -0.689          | 0.067            | -10.277            | ***0.000       |
|                 | Year 2004   | -0.807          | 0.074            | -10.874            | ***0.000       |
|                 | Year 2005   | -0.798          | 0.072            | -11.141            | ***0.000       |
|                 | Year 2006   | -0.548          | 0.071            | -7.716             | ***0.000       |
|                 | Year 2007   | -0.495          | 0.071            | -6.930             | ***0.000       |
|                 | Year 2008   | -0.561          | 0.077            | -7.269             | ***0.000       |
|                 | Year 2009   | -0.223          | 0.084            | -2.634             | ***0.008       |
|                 | Year 2010   | -0.352          | 0.094            | -3.734             | ***0.000       |
|                 | Year2011    | -0.558          | 0.089            | -6.252             | ***0.000       |
|                 | Year 2012   | -0.347          | 0.072            | -4.816             | ***0.000       |
|                 | Year 2013   | -0.516          | 0.064            | -8.030             | ***0.000       |
|                 | Year 2014   | -0.868          | 0.078            | -11.088            | ***0.000       |
|                 | Year 2015   | -0.135          | 0.068            | -1.970             | ***0.049       |
|                 | Year 2016   | 0.044           | 0.066            | 0.663              | 0.507          |
|                 | Year 2017   | -0.410          | 0.068            | -6.016             | ***0.000       |
|                 | Year 2018   | -0.167          | 0.070            | -2.392             | ***0.017       |
| <i>Bigeye</i>   | Intercept   | 1.160           | 0.067            | 17.440             | ***0.000       |
|                 | Year 2003   | -0.764          | 0.090            | -8.467             | ***0.000       |
|                 | Year 2004   | -0.585          | 0.095            | -6.133             | ***0.000       |
|                 | Year 2005   | -0.278          | 0.088            | -3.175             | ***0.002       |
|                 | Year 2006   | -0.139          | 0.087            | -1.589             | 0.112          |
|                 | Year 2007   | -0.023          | 0.087            | -0.266             | 0.791          |
|                 | Year 2008   | -0.134          | 0.092            | -1.447             | 0.148          |
|                 | Year 2009   | -0.077          | 0.105            | -0.731             | 0.465          |
|                 | Year 2010   | -0.313          | 0.117            | -2.681             | ***0.007       |
|                 | Year2011    | -0.883          | 0.121            | -7.277             | ***0.000       |
|                 | Year 2012   | -0.646          | 0.098            | -6.596             | ***0.000       |
|                 | Year 2013   | -0.754          | 0.087            | -8.684             | ***0.000       |
|                 | Year 2014   | -0.935          | 0.104            | -9.021             | ***0.000       |
|                 | Year 2015   | -0.169          | 0.088            | -1.916             | ***0.055       |
|                 | Year 2016   | -0.358          | 0.089            | -4.015             | ***0.000       |
|                 | Year 2017   | -0.517          | 0.090            | -5.727             | ***0.000       |
|                 | Year 2018   | -0.463          | 0.094            | -4.941             | ***0.000       |
| <i>Skipjack</i> | Intercept   | -2.377          | 0.185            | -12.874            | ***0.000       |

|           |           |        |       |        |          |
|-----------|-----------|--------|-------|--------|----------|
| Yellowfin | Year 2003 | 0.191  | 0.229 | 0.834  | 0.404    |
|           | Year 2004 | -0.095 | 0.253 | -0.373 | 0.709    |
|           | Year 2005 | -0.251 | 0.251 | -1.000 | 0.317    |
|           | Year 2006 | -0.996 | 0.280 | -3.560 | ***0.000 |
|           | Year 2007 | -1.124 | 0.289 | -3.892 | ***0.000 |
|           | Year 2008 | -1.825 | 0.346 | -5.277 | ***0.000 |
|           | Year 2009 | -1.500 | 0.388 | -3.867 | ***0.000 |
|           | Year 2010 | -0.370 | 0.355 | -1.041 | 0.298    |
|           | Year2011  | 0.182  | 0.302 | 0.603  | 0.546    |
|           | Year 2012 | 0.041  | 0.258 | 0.159  | 0.874    |
|           | Year 2013 | -0.322 | 0.236 | -1.366 | 0.172    |
|           | Year 2014 | 0.970  | 0.239 | 4.053  | ***0.000 |
|           | Year 2015 | 0.701  | 0.236 | 2.972  | ***0.003 |
|           | Year 2016 | 2.001  | 0.215 | 9.307  | ***0.000 |
|           | Year 2017 | 1.707  | 0.215 | 7.941  | ***0.000 |
|           | Year 2018 | 1.388  | 0.226 | 6.138  | ***0.000 |
|           | Intercept | 1.669  | 0.071 | 23.415 | ***0.000 |
|           | Year 2003 | -0.300 | 0.089 | -3.356 | ***0.001 |
|           | Year 2004 | 0.347  | 0.090 | 3.844  | ***0.000 |
|           | Year 2005 | -0.110 | 0.092 | -1.196 | 0.232    |
|           | Year 2006 | -0.074 | 0.092 | -0.803 | 0.422    |
|           | Year 2007 | 0.393  | 0.089 | 4.397  | ***0.000 |
|           | Year 2008 | 0.520  | 0.092 | 5.673  | ***0.000 |
|           | Year 2009 | 0.422  | 0.103 | 4.089  | ***0.000 |
|           | Year 2010 | -0.026 | 0.115 | -0.227 | 0.820    |
|           | Year2011  | 0.650  | 0.100 | 6.522  | ***0.000 |
|           | Year 2012 | 0.403  | 0.092 | 4.389  | ***0.000 |
|           | Year 2013 | -0.004 | 0.086 | -0.046 | 0.964    |
|           | Year 2014 | 0.655  | 0.090 | 7.267  | ***0.000 |
|           | Year 2015 | 0.876  | 0.086 | 10.210 | ***0.000 |
|           | Year 2016 | 0.990  | 0.085 | 11.711 | ***.000  |
|           | Year 2017 | 0.937  | 0.084 | 11.167 | ***0.000 |
|           | Year 2018 | 0.571  | 0.089 | 6.427  | ***0.000 |

---

\*\*\**p-value < 0.005 is highly significant*

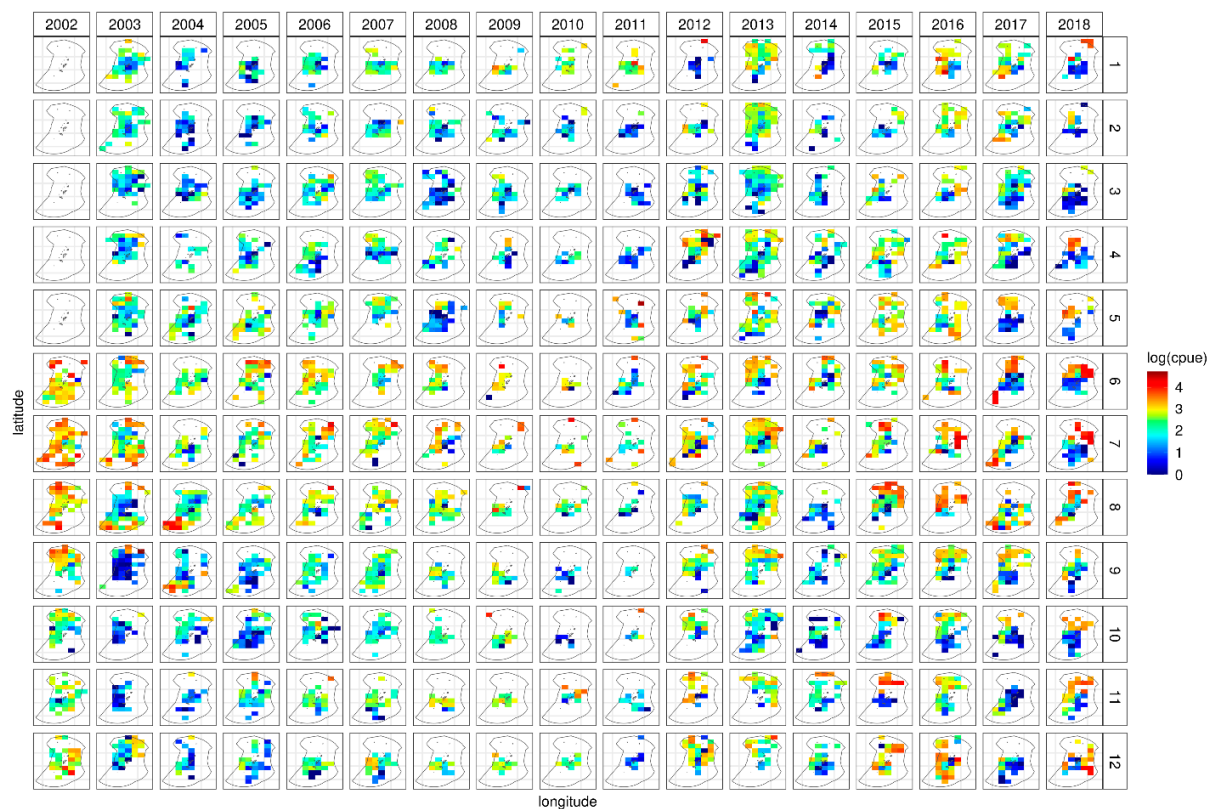

**Figure S1.** Spatio-temporal pattern in the distribution of *albacore* tuna within the EEZ, longitude 14.5°S–20.22°S, longitude 171.31°W–179.10°W of Tonga. Data aggregated to coarser resolution of 0.3 degree (~5NM).

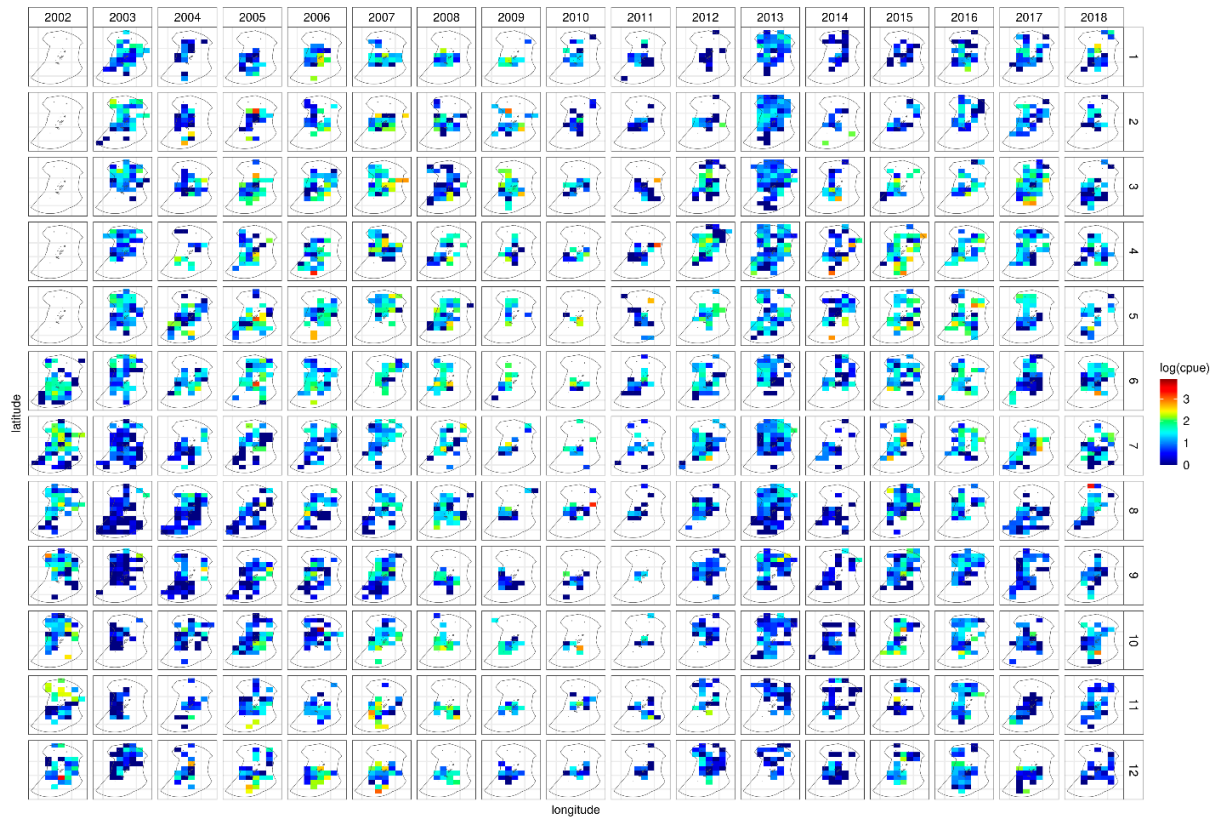

**Figure S2.** Spatio-temporal pattern in the distribution of bigeye tuna in the EEZ, longitude  $14.5^{\circ}\text{S}$ – $20.22^{\circ}\text{S}$ , longitude  $171.31^{\circ}\text{W}$ – $179.10^{\circ}\text{W}$  of Tonga. Data aggregated to coarser resolution of 0.3 degree ( $\sim 5\text{NM}$ ).

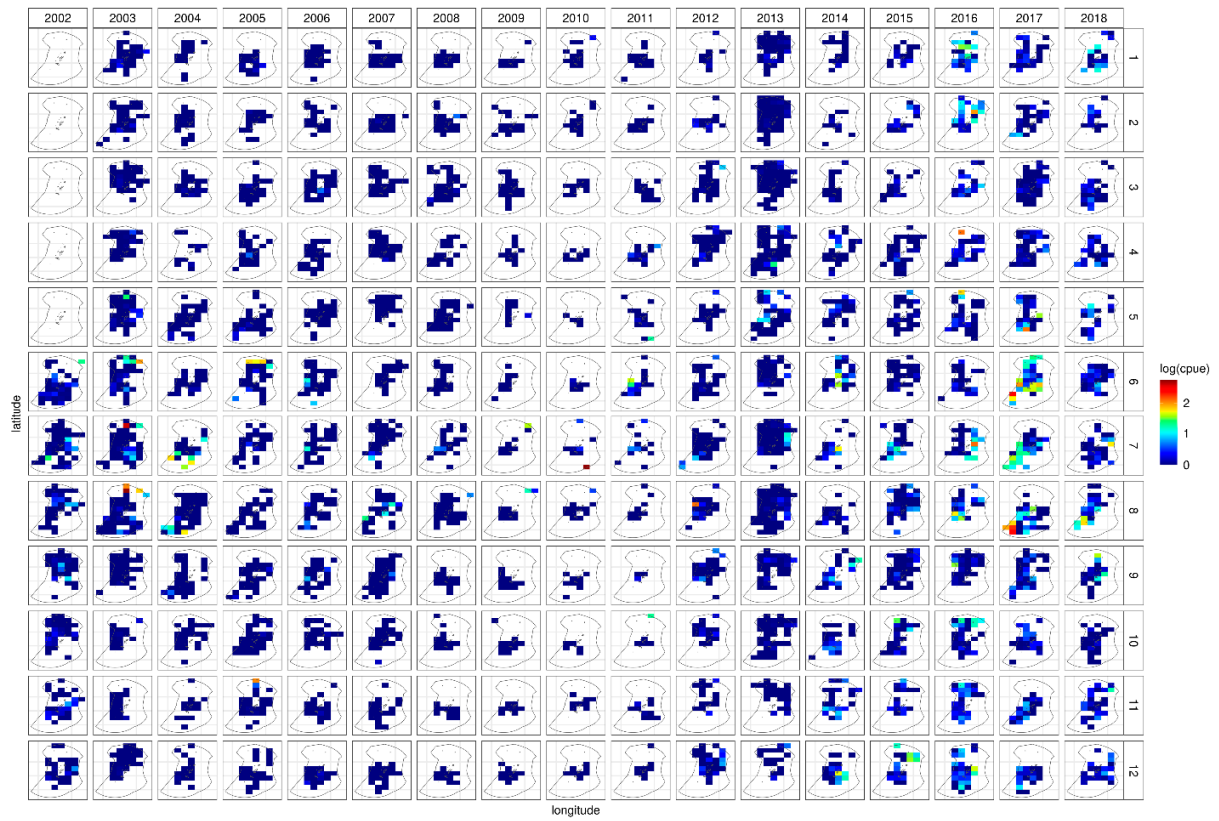

**Figure S3.** Spatio-temporal pattern in the distribution of skipjack tuna in the EEZ, longitude  $14.5^{\circ}\text{S}$ –  $20.22^{\circ}\text{S}$ , longitude  $171.31^{\circ}\text{W}$ –  $179.10^{\circ}\text{W}$  of Tonga. Data aggregated to coarser resolution of 0.3 degree ( $\sim 5\text{NM}$ ).



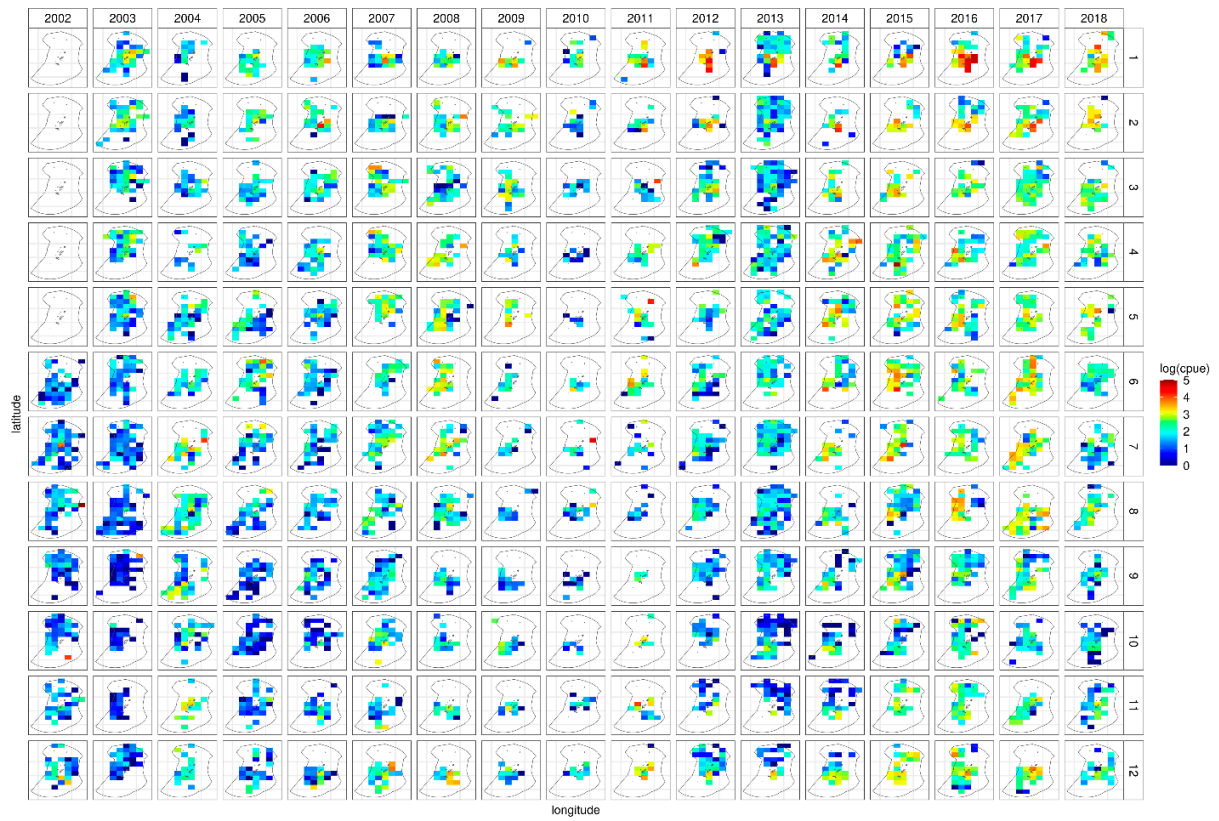

**Figure S4.** Spatio-temporal pattern in the distribution of yellowfin tuna in the EEZ, longitude 14.5°S–20.22°S, longitude 171.31°W–179.10°W of Tonga. Data aggregated to coarser resolution of 0.3 degree (~5NM).

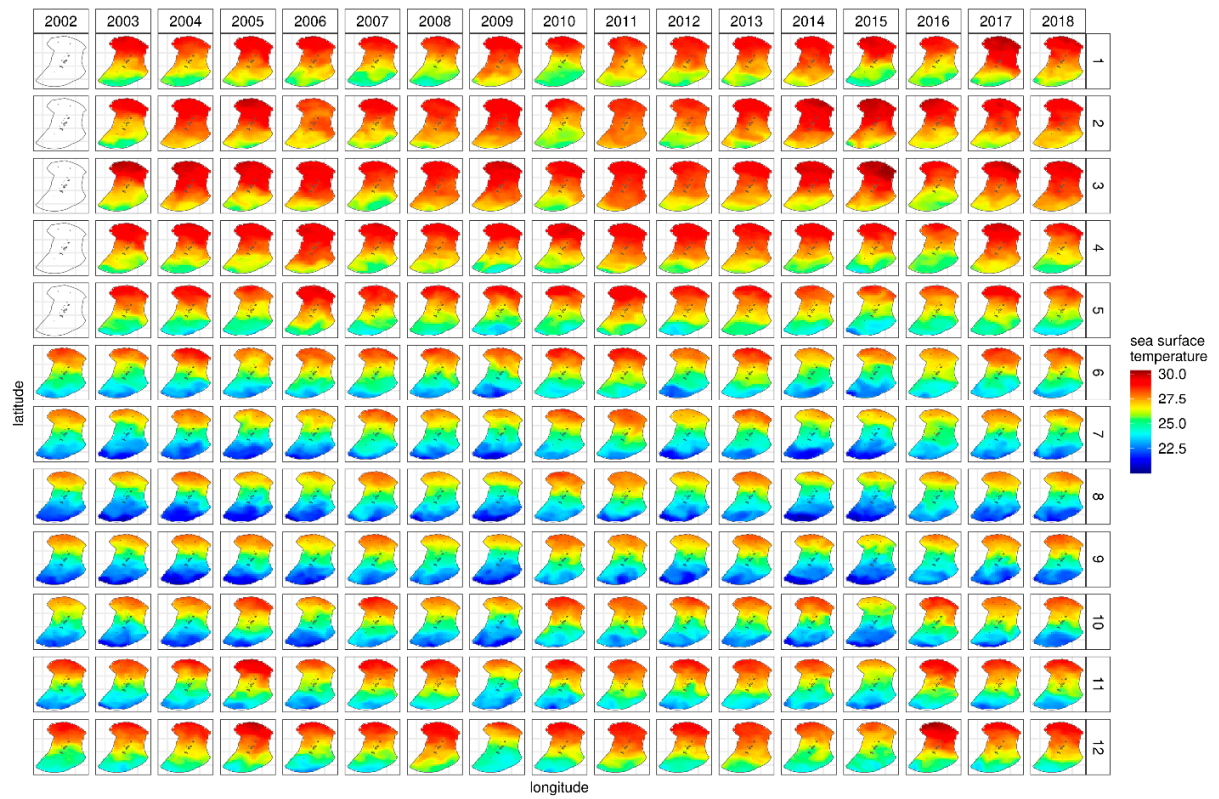

**Figure S5.** Annual and monthly variability of sea surface temperature for the EEZ, longitude  $14.5^{\circ}\text{S}$ – $20.22^{\circ}\text{S}$ , longitude  $171.31^{\circ}\text{W}$ – $179.10^{\circ}\text{W}$  of Tonga. Data aggregated to coarser resolution of 0.3 degree ( $\sim 5\text{NM}$ ).

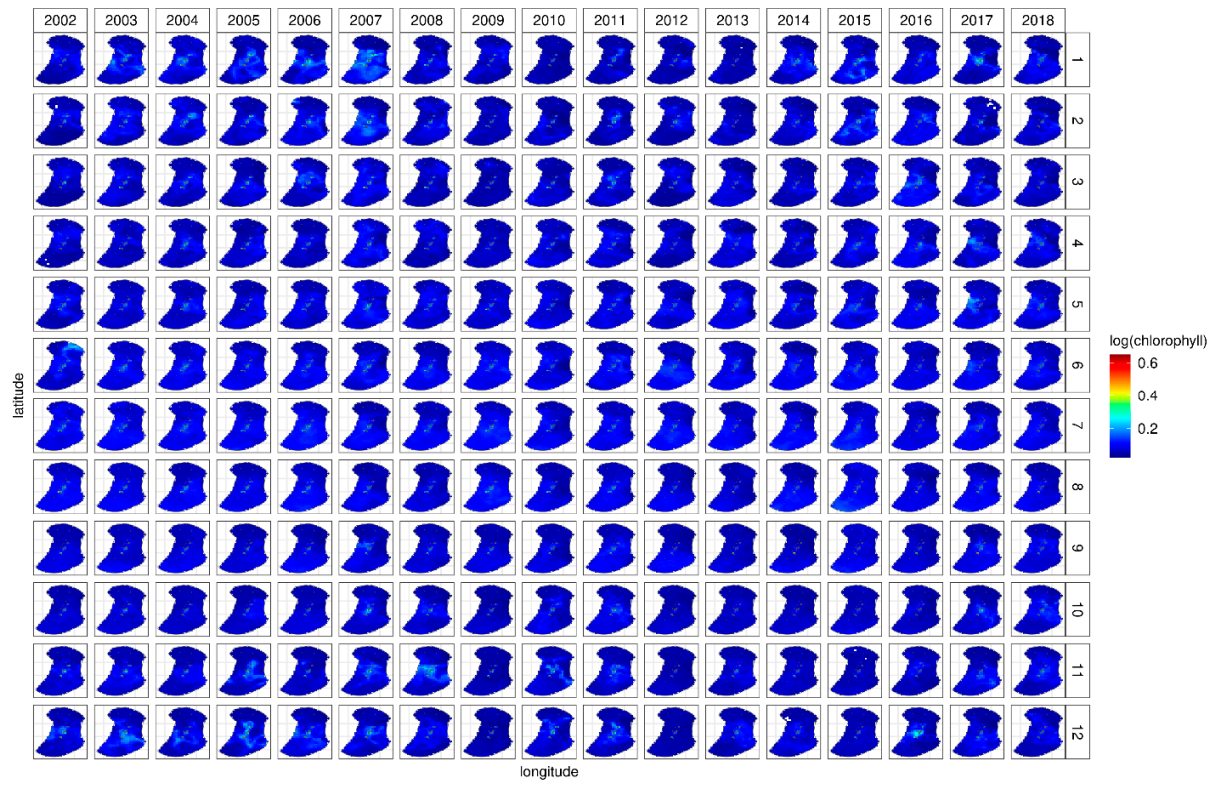

**Figure S6.** Annual and monthly variability of sea surface chlorophyll for the EEZ, longitude  $14.5^{\circ}\text{S}$ – $20.22^{\circ}\text{S}$ , longitude  $171.31^{\circ}\text{W}$ – $179.10^{\circ}\text{W}$  of Tonga.

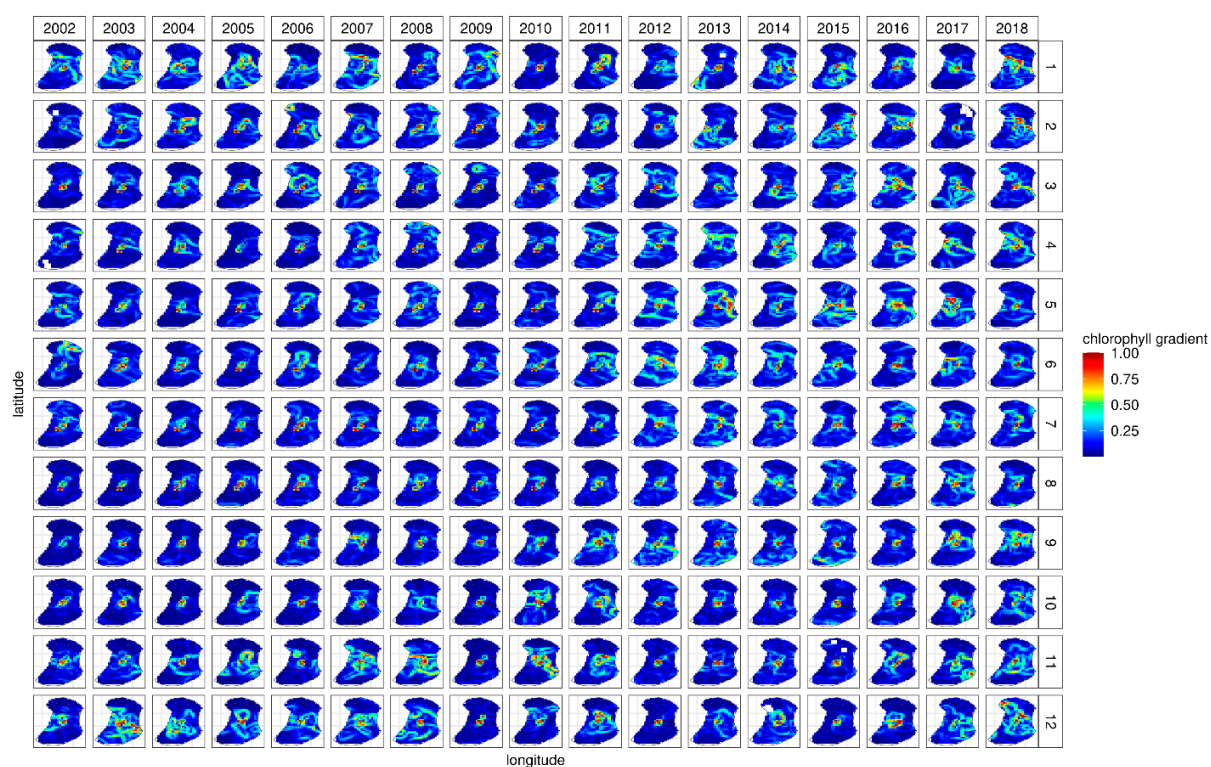

**Figure S7.** Annual and monthly variability of sea surface chlorophyll gradient for the EEZ, longitude  $14.5^{\circ}\text{S}$ – $20.22^{\circ}\text{S}$ , longitude  $171.31^{\circ}\text{W}$ – $179.10^{\circ}\text{W}$  of Tonga.

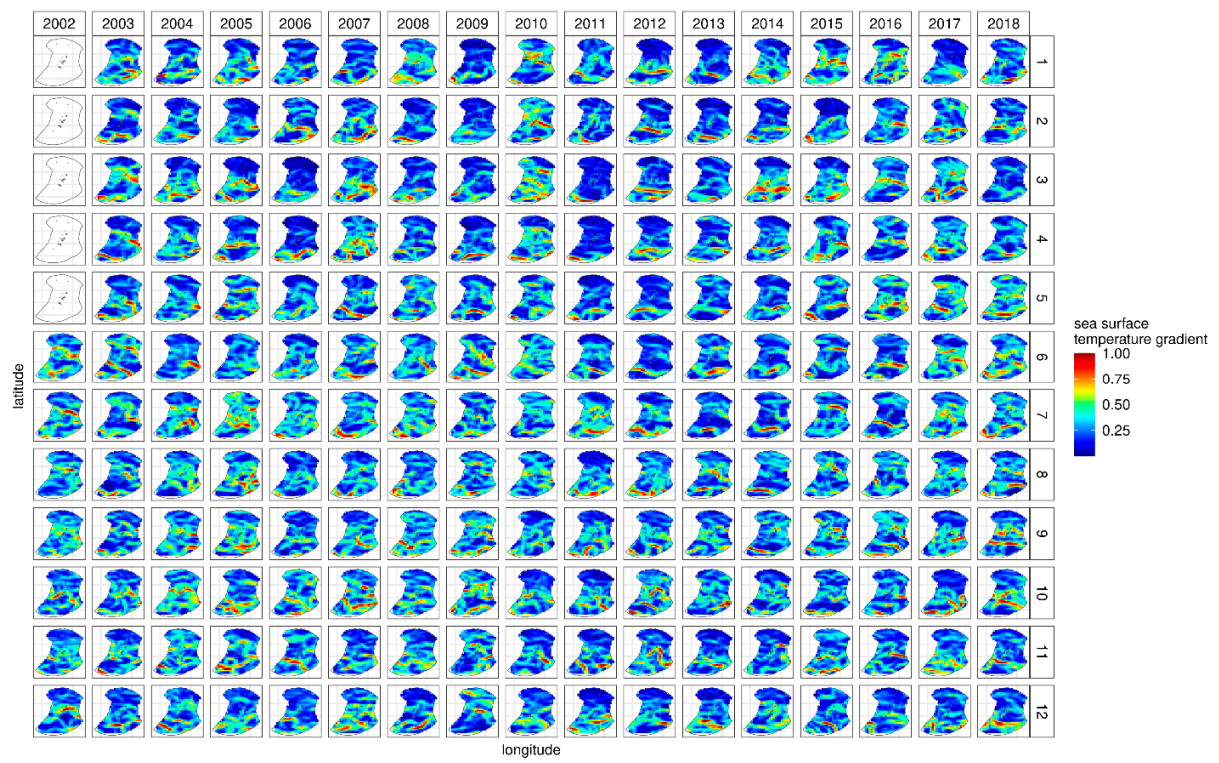

**Figure S8.** Annual and monthly variability of sea surface temperature gradient for the EEZ, longitude  $14.5^{\circ}\text{S}$ – $20.22^{\circ}\text{S}$ , longitude  $171.31^{\circ}\text{W}$ – $179.10^{\circ}\text{W}$  of Tonga.

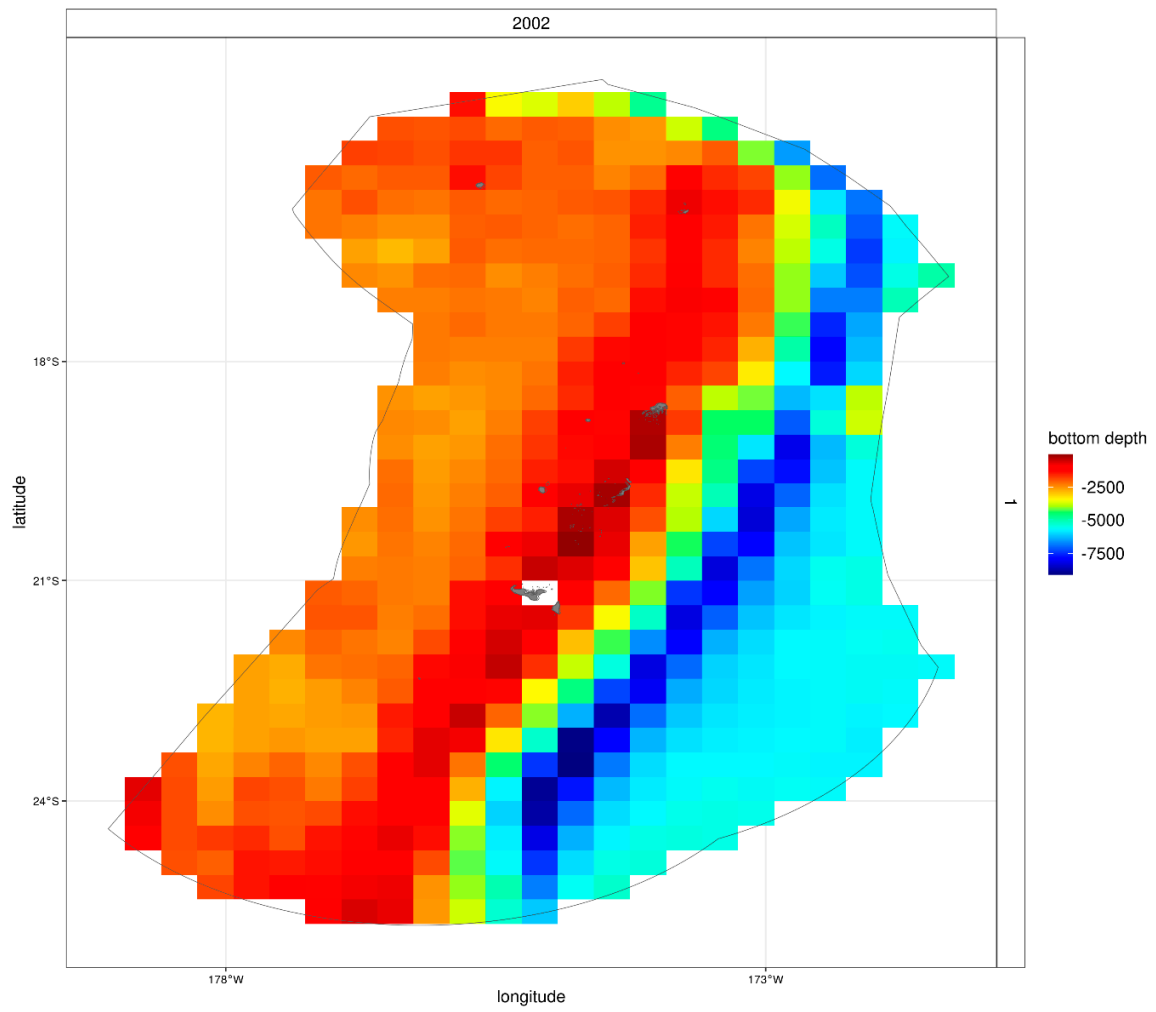

**Figure S9.** Bathymetry for the EEZ, longitude 14.5°S–20.22°S, longitude 171.31°W–179.10°W of Tonga.



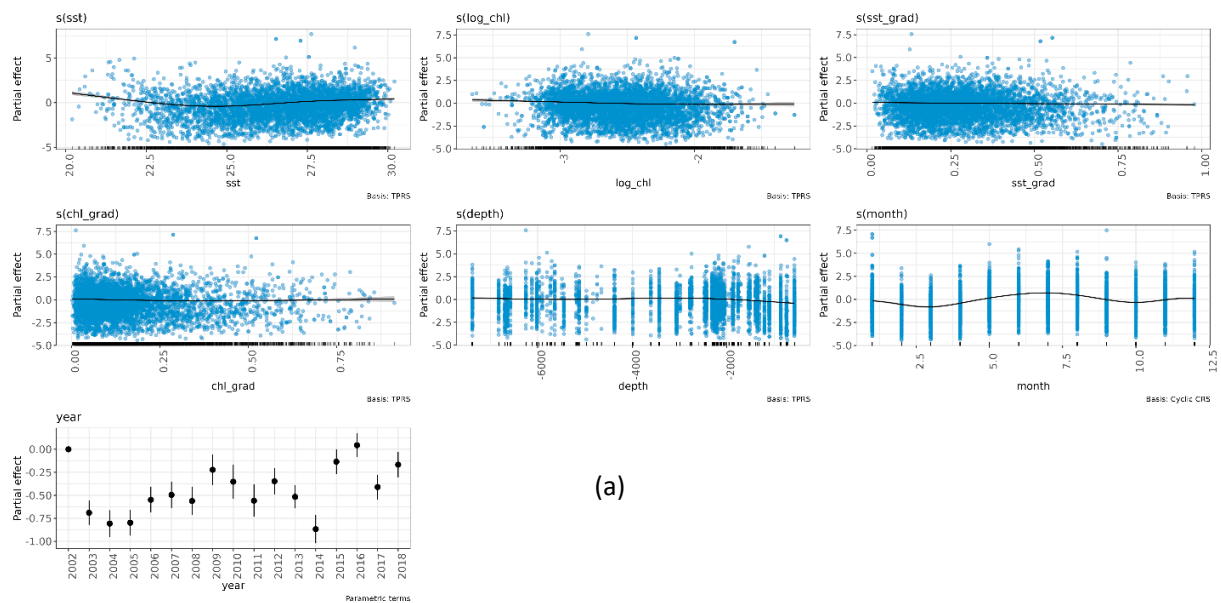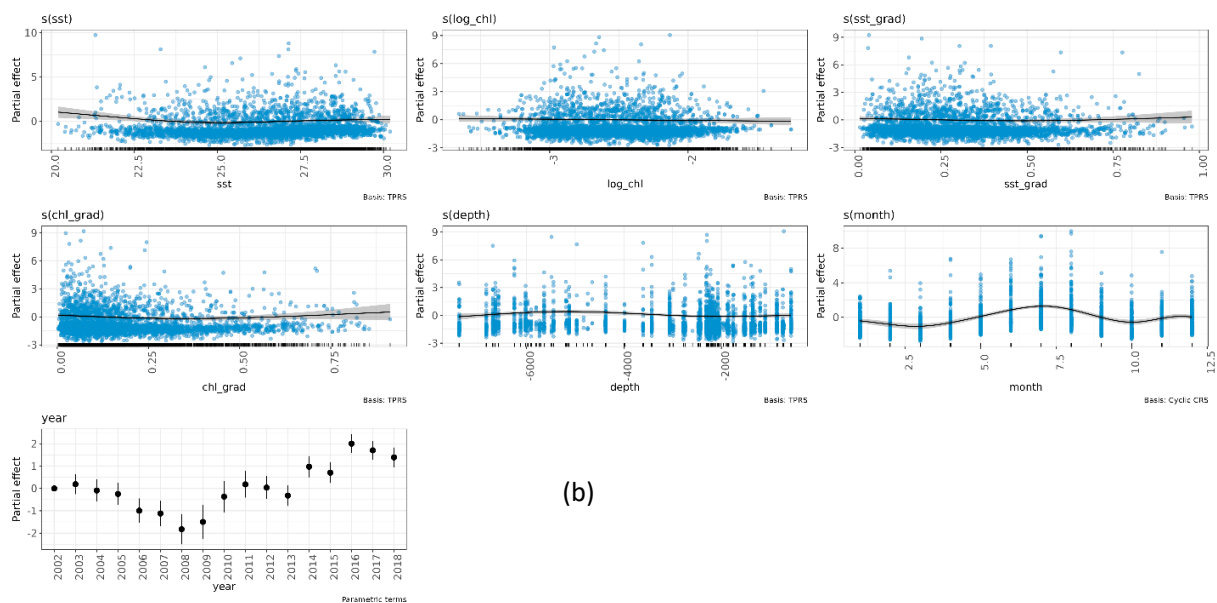

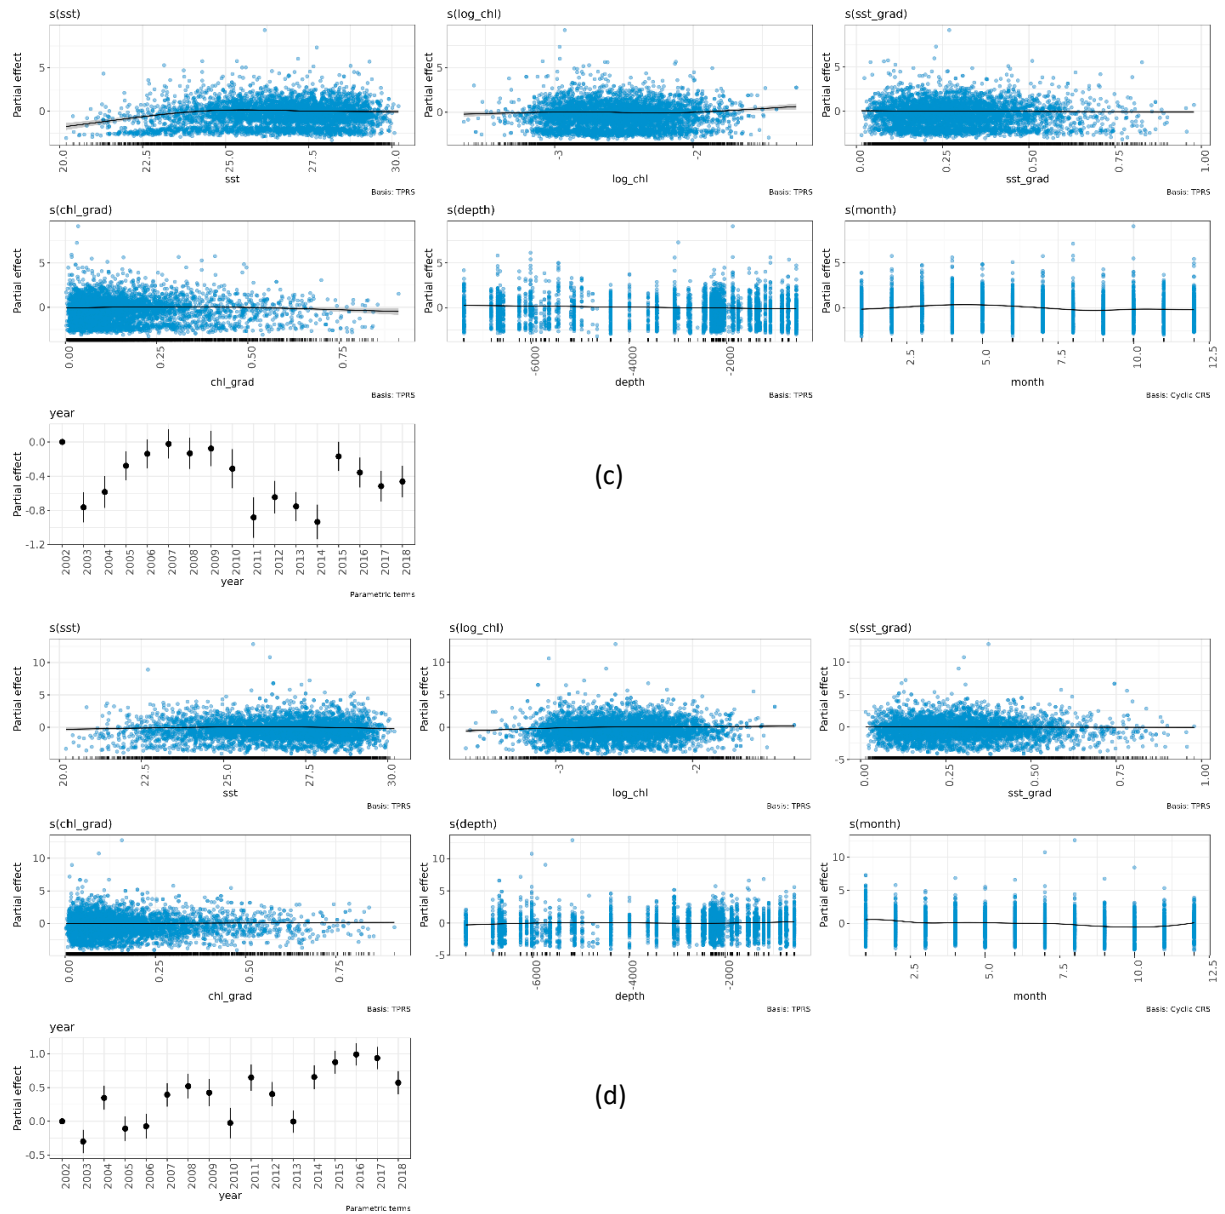

**Figure S10.** The partial effects with partial residuals for covariates *chl\_grad*, *depth*, *Chl-a*, *SST*, *sst\_grad*, *month* and *year* for (a) albacore, (b) bigeye, (c) skipjack and (d) yellowfin respectively, within the EEZ, longitude 171.31° W–179.10° W of Tonga.



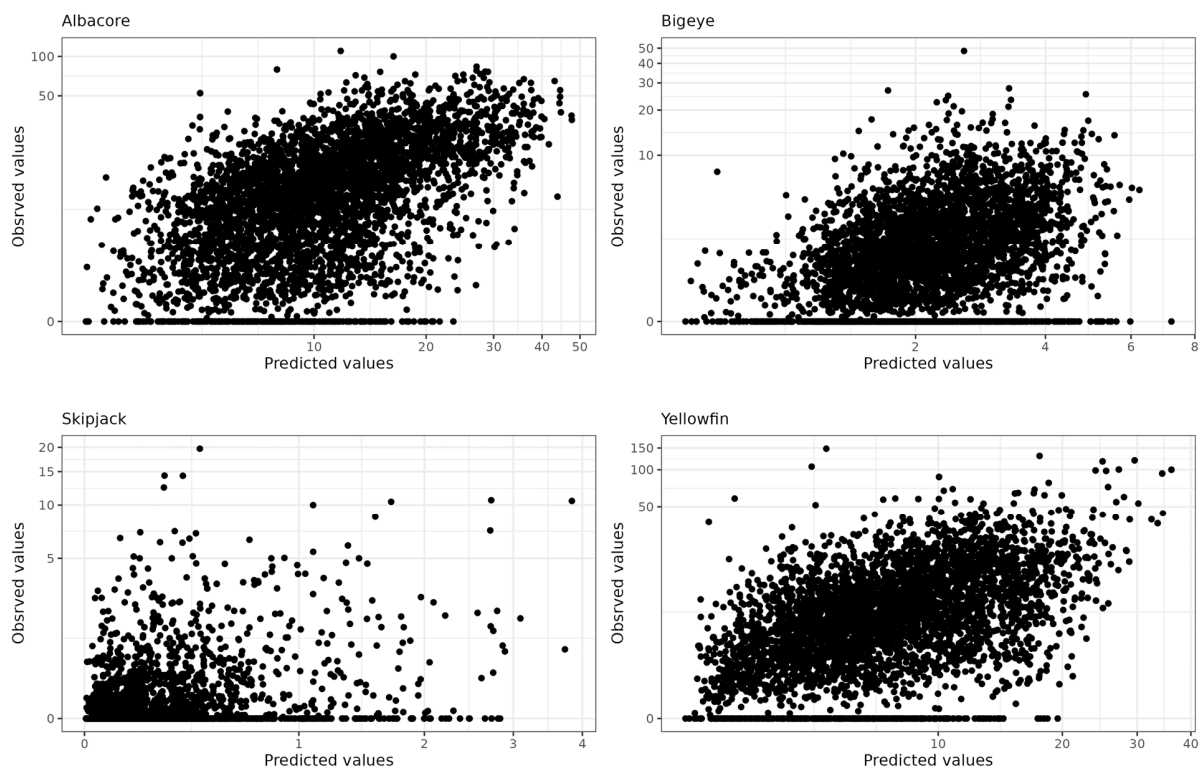

**Figure S11.** Model diagnostic plots of predicted values vs observed values for each species presented in log-scale for visual purpose.

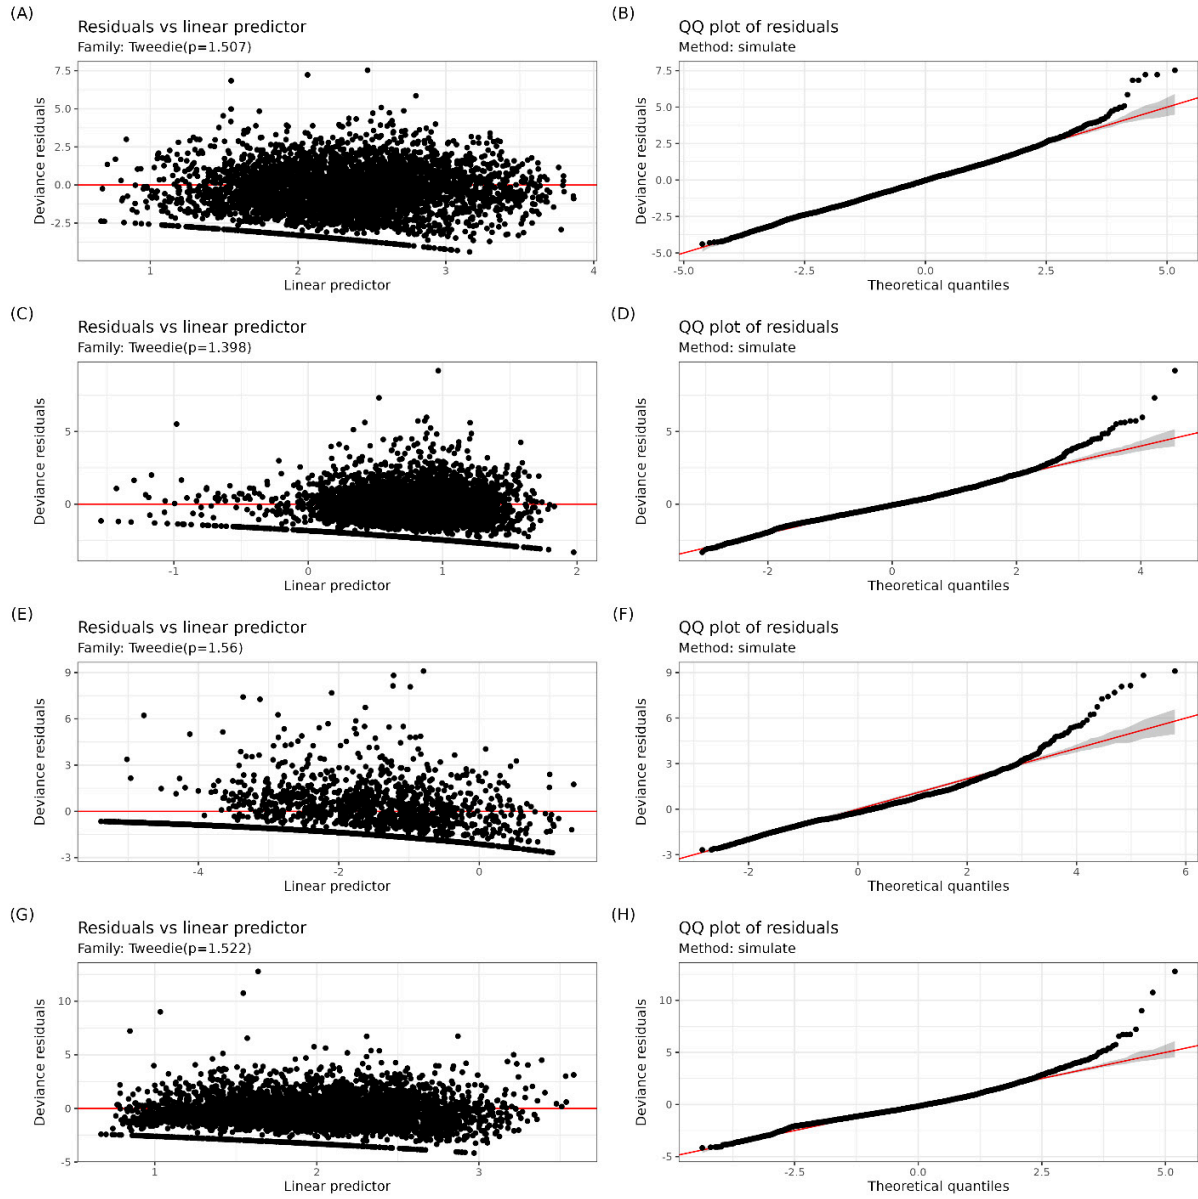

**Figure S12.** Model diagnostics plot of linear predictors vs deviance residuals and quantile-quantile plots of theoretical values vs deviance residuals for albacore (panels A and B), bigeye (panels C and D), skipjack (panels E and F) and yellowfin (panels G and H) in the EEZ, longitude  $14.5^{\circ}\text{S}$ – $20.22^{\circ}\text{S}$ , longitude  $171.31^{\circ}\text{W}$ – $179.10^{\circ}\text{W}$  of Tonga.
